# Supplementary material for: Dynamic and reversible tuning of pixelated plasmonic cluster arrays
Source: Royal Society of Chemistry journal article supplement (doi:10.1039/d1tc04109f), 2021-01-01
Supplement: d1tc04109f1.pdf [file d1tc04109f1.pdf]

Electronic Supplementary Information

# Dynamic and reversible tuning of pixelated plasmonic cluster arrays

Fangfang Deng,<sup>†a</sup> Junxiang Xiang,<sup>†b</sup> Ze Liu<sup>\*b,c</sup> and Tao Ding<sup>\*a</sup>

- a. Key Laboratory of Artificial Micro- and Nano-structures of Ministry of Education of China, School of Physics and Technology, Wuhan University, Wuhan 430072 China.
- b. Department of Engineering Mechanics, School of Civil Engineering, Wuhan University, Wuhan, Hubei 430072, China.
- c. State Key Laboratory of Water Resources & Hydropower Engineering Science, Wuhan University, Wuhan 430072, China.

† These authors contributed equally.

\* Corresponding author E-mail: ze.liu@whu.edu.cn (Z. Liu); t.ding@whu.edu.cn (T. Ding).

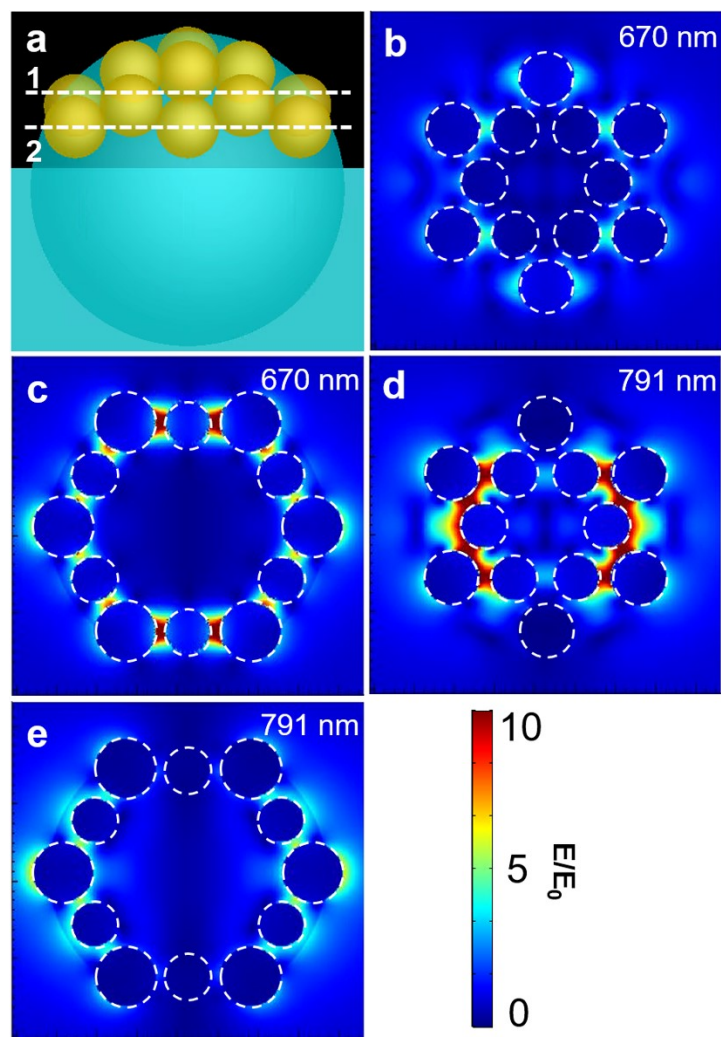

**Figure S1.** FDTD simulation of the electric near field profile of Au nanocluster embedded in PDMS dome. (a) Scheme of the simplified model. Near field of cross-section (1) (b, d) and (2) (c, e) marked in (a). The wavelength for (b, c) is 670 nm and for (d, e) is 791 nm.

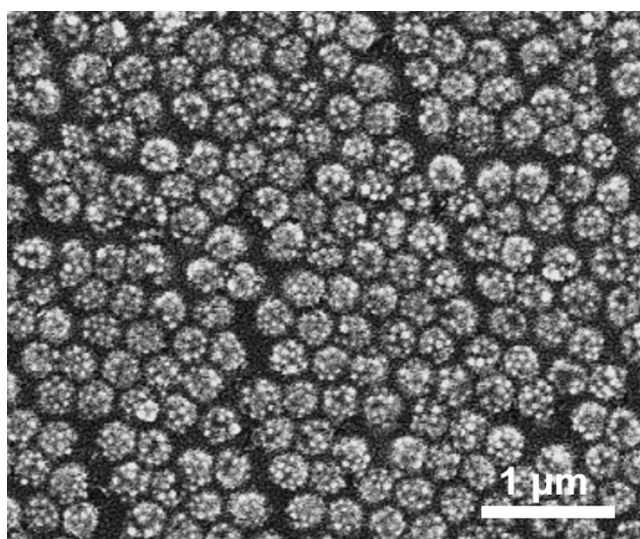

**Figure S2.** SEM image of Au clusters embedded in PDMS substrate after cycles of solvent-tuning and mechanical stretching.
